# Supplementary material for: Monitoring the record-breaking wave event in Melilla harbour (SW Mediterranean Sea)
Source: Copernicus journal article supplement (doi:10.5194/sp-2023-31), 2023-08-29
Supplement: Supplementary file [file sp-2023-31-AC1-supplement.pdf]

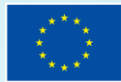

Funded by  
the European Union

---

# Copernicus

## Ocean State Report 8

---

**Call of contribution**

**COPERNICUS MARINE SERVICE**

**MERCATOR OCEAN INTERNATIONAL**  
**12 DECEMBER 2022**

Programme of the

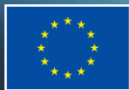

EUROPEAN UNION

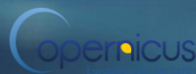

implemented by

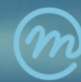

**MERCATOR  
OCEAN**  
INTERNATIONAL

# OVERVIEW

---

## Call of contribution for the 8<sup>th</sup> cycle of the Copernicus Ocean State Report (Copernicus OSR): Q&A

### Where can I find information on the call of contribution?

- All documents for the OSR8 call of contribution are stored at (incl. templates) the OSR8 atlas link: <https://atlas.mercator-ocean.fr/s/ycWec5N62ZjjygS>
- Information calls are proposed on:
  - Thursday, 22.12.2022, 10 am, (Join Zoom meeting: <https://us02web.zoom.us/j/87129737226> ; Meeting ID: 871 2973 7226, Passcode: 563558)
  - Thursday, 12.01.2023, 11am (Join Zoom Meeting: <https://us02web.zoom.us/j/89626171412>; Meeting ID: 896 2617 1412; Passcode: 468252)
  - Friday, 20.01.2023, 10am (Join Zoom Meeting: <https://us02web.zoom.us/j/82506994903>; Meeting ID: 825 0699 4903; Passcode: 889805)

If any of these proposed time slots is not suitable for you, please contact the OSR coordination team via [osr8@mercator-ocean.fr](mailto:osr8@mercator-ocean.fr)

### How do I submit my proposal for Copernicus OSR8?

- The propositions can be submitted through upload in the respective chapter folders: <https://atlas.mercator-ocean.fr/s/ycWec5N62ZjjygS>
- More details on each chapter are provided below (section 2), and further questions can be tackled during the Q&A zoom call (see details above).

### How do I propose my contributions?

- A template is provided at the end of this document and on the link above, [the OSR8 atlas link](#) (see question 1). Once the template is completed, please upload it on the already mentioned atlas link. The use of at least one CMEMS product is mandatory, and up to the target year, 2022.

### When does the call of contribution for the OSR8 cycle close?

- The call of contribution will close on Wednesday, 1<sup>st</sup> of February 2023.

### Which is the major point of contact?

- Correspondence to: [osr8@mercator-ocean.fr](mailto:osr8@mercator-ocean.fr)

### How is the 8<sup>th</sup> CMEMS OSR cycle organized?

- The roadmap for the 8<sup>th</sup> cycle of the CMEMS OSR is provided in Figure 3, and further described in section 1.2 below.

# 1 ORGANISATION

## 1. Organization of the 8<sup>th</sup> cycle of the Copernicus Ocean State Report

The overall organization of the Copernicus Ocean State Report (Fig. 1) is implemented across different levels, i.e.:

- the Ocean State Report (OSR) coordination is assured by Mercator Ocean international and covers the overall coordination, strategy, and provides support and assistance to the author team for the draft development throughout each cycle.
- the OSR editorial board: The OSR editorial board manages the independent (from the coordination) peer-review process in collaboration with the [State of the Planet Journal](#).
- the OSR author team is established during each Report cycle through the call of contribution process and is fully supported by the OSR coordination. Copernicus Marine producers are solicited for the contributions for each call and is also open for contributions from external experts. The author teams are additionally supported by OSR guidelines, which will be provided after the call of contribution phase.
- The OSR content follows the goals of the [OSR strategy](#), and is organized in 4 principal chapters, which are further detailed in section 2.2.

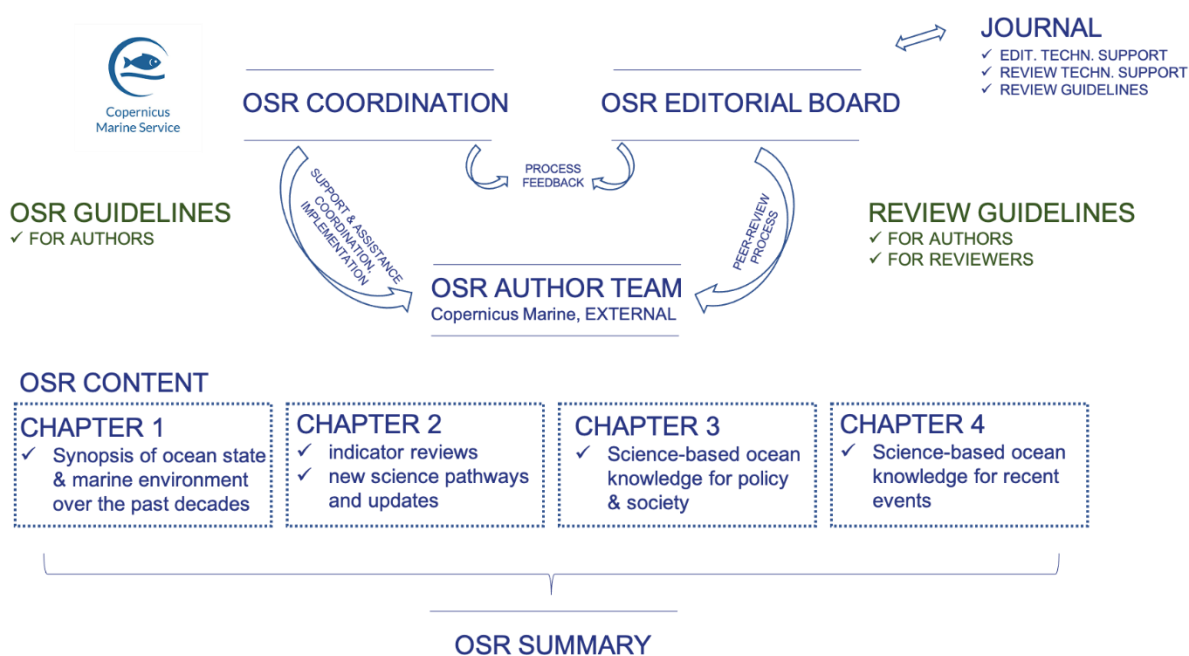

**Figure 1:** Overview on the organization of the Copernicus Ocean State Report (OSR).

A roadmap for the development of the Copernicus OSR draft is presented in Figure 2. Each cycle is coordinated within several steps that include the following milestones:

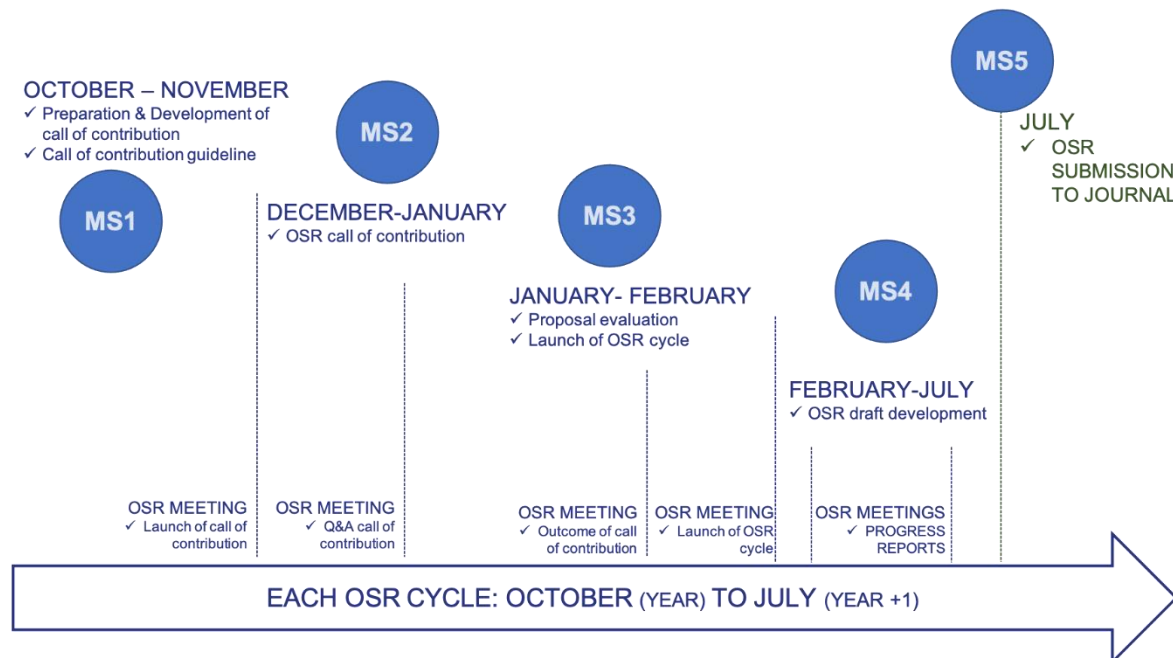

**Figure 2:** Roadmap of the Copernicus OSR draft developments. Each cycle is coordinated within different steps for chapter 1 – chapter 4 (section 2.2), including several milestones such as the call of contribution, the launch of each OSR cycle development, the OSR draft development and the first submission to the Journal for peer-review.

- MS 1- Establishment of call of contribution guideline:** The OSR coordination develops each year in October-November a guideline for the call of contribution, which includes information on the criteria for contributions for each OSR chapter, as well as details on the organisation for this call.
- MS 2- OSR call of contribution:** The call of contribution for each OSR Year runs from December to January (year+1) and is launched through notification via mail to the TAC and MFC leaders and the MYP experts. A mid-term remote call is usually organized by the OSR coordination to allow for preliminary exchanges with applicants, and clarifications. The call of contribution usually closes during the last week of January/early February. For Chapter 1 and according to the refined OSR content (see section 2.2), the call of contribution will include a structuration of chapter 1 on the indicator topics, allowing for the nomination of authors by the TACs and MFCs for contribution.
- MS 3 - Launch of OSR cycle:** During January/early February, the OSR coordination evaluates the proposed contributions. In some cases, further exchanges with some individual author teams will be proposed to seek for clarifications and to decide whether a section, from chapter 2 and 3, will run through a 1-year or a 2-year development phase. The outcomes of the call of contribution are then communicated usually mid-February during a remote call with the author teams. During the second part of February, the OSR coordination establishes the organisation (e.g., google doc launch), and prepares and disseminates the OSR guideline, including details on section developments, and organisational elements for author assistance. A remote call is then organized by the OSR coordination during which each author team introduces their proposed sections. For chapter 1, a specific call will be organized with the nominated experts, and additional experts will be potentially solicited to complement expertise.

- **MS 4 - OSR draft development:** The period from February to July is dedicated to the section development. This period is organized within several steps, such as deadlines for several stages of the section development, regular remote calls with the entire author team, ad-hoc individual calls for specific clarifications and draft development support, internal review steps, etc.
- **MS 5- OSR first submission to the journal for peer-review:** During June to July, intensive exchanges between the OSR coordination and the author teams are established through final internal review steps, and intensive draft development support. The request for the submission of the final section packages (section draft, author information, figures in low resolution) is usually launched by mid of June. Experience has shown that the period of one month needs to be usually anticipated to finalize the complete deposit of all sections to get ready for the submission of chapter 2 - chapter 4 by mid of July.

## 1.1 Document and information exchange:

- **One main OSR8 google doc** will be used for the organization:  
<https://docs.google.com/document/d/1HSFpoM7wHfyWHLm664XjmVjpmSrZxiENeaog3ED-uUY/edit?usp=sharing> Moreover, document exchange will run through the **OSR8 atlas link:**  
<https://atlas.mercator-ocean.fr/s/ycWec5N62ZjygS>
- There are several folders provided under this link, particularly one folder called **'call\_of\_contribution'**. In this folder you will find 4 additional folders, i.e., one for each chapter, and you are invited to **upload your proposal in the respective chapter folder** for the call of contribution.
- To facilitate the attribution of your topic to one of the 4 chapters, a **description of each chapter** is provided in section 2 of this document.
- You are also invited to access **earlier OSR reports**, more information and links can be found at: <https://marine.copernicus.eu/science-learning/ocean-state-report/>
- Information on the call of contribution has been sent to the CMEMS TAC & MFC leaders, the Science, OSR, OMI experts, and all Copernicus OSR7 authors.
- Once the call of contribution is closed, notifications will run through the google doc, and a specific mailing list will be established based on the contact points provided in the call of contribution documents. **Please assure to clearly indicate all emails in the call of contribution documents for those who wish to be included in the regular information exchange.**
- **A OSR8 guideline will be provided on the 09. February 2023**, i.e., when the outcome of the call of contribution is finalized and communicated via the google doc, and the second OSR8 call on the same day, 10-12am (Toulouse time).
- Propositions for the “call of contributions” will be reviewed by MOI under the criteria given below for each chapter. The outcome of the call of contribution will be communicated on the 09<sup>th</sup> of February 2023.

- Organization of call of contribution: submission of section propositions should be done by chapter. Only section propositions following the corresponding templates will be accepted by MOI, and they can be found in the appendix of this guideline and have to be uploaded on the atlas. Please copy/paste and fill in.
- The completed template should be uploaded on the atlas no later than by the 1<sup>st</sup> of February 2023. The link to upload the document is given at the first page of this document. **Submission via email will be not taken into account.**

## 1.2 Roadmap of OSR8: Regular remote calls, milestones and internal review process

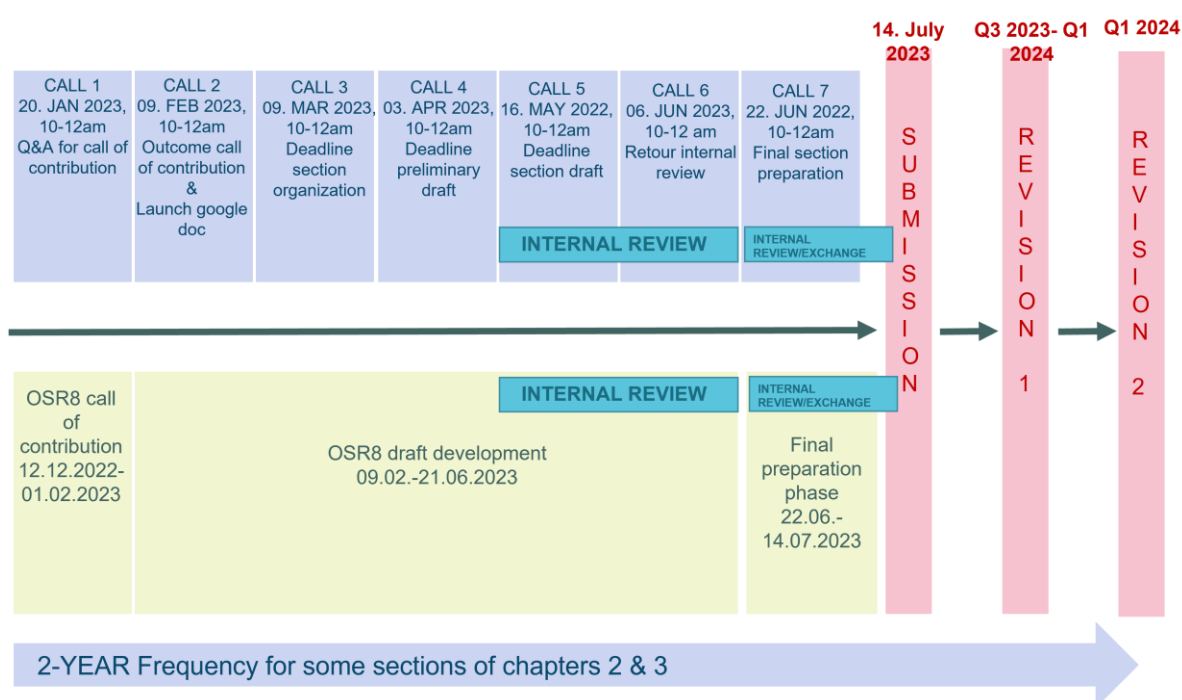

**Figure 3:** Roadmap for the Copernicus OSR#8 development, status 12. December 2022.

**ZOOM meetings** (all Toulouse local time): Meeting details are provided below, and will be also sent out in the morning of the meeting date to the OSR8 email list, and provided in the google-doc

- Meeting 1: Thursday, 22.12.2022, 10-12 am: **Objective:** Info on OSR8 cycle and new strategy, Q&A for call of contribution; (Join Zoom meeting: <https://us02web.zoom.us/j/87129737226>; Meeting ID: 871 2973 7226, Passcode: 563558)
- Meeting 2: Thursday, 12.01.2023, 11-12:30 am: **Objective:** Info on OSR8 cycle and new strategy, Q&A for call of contribution; (Join Zoom Meeting:

<https://us02web.zoom.us/j/89626171412>; Meeting ID: 896 2617 1412; Passcode: 468252)

- Meeting 3: 20. January 2023, 10-12am: Objective: Info on OSR8 cycle and new strategy, Q&A for call of contribution; (Join Zoom Meeting: <https://us02web.zoom.us/j/82506994903>; Meeting ID: 825 0699 4903, Passcode: 889805)
- Meeting 4: 9. February 2023, 10-12 am: Objective: Outcome of call of contribution (Join Zoom meeting: <https://us02web.zoom.us/j/87125438987>; Meeting ID: 871 2543 8987, Passcode: 907853)
- Meeting 5: 9. March 2023, 10-12 am: Objective: Overview on section organization (2h, each section will present): (Join Zoom meeting: <https://us02web.zoom.us/j/87568200624>; Meeting ID: 875 6820 0624, Passcode: 502258)
- Meeting 6: 3. April 2023, 10-12 am: Objective: Overview on section draft progress (2h, each section will present); (Join Zoom meeting: <https://us02web.zoom.us/j/89307093323>; Meeting ID: 893 0709 3323, Passcode: 110756)
- Meeting 7: 16. May 2023, 10-12 am: Objective: Overview on section draft progress (2h, each section will present); (Join Zoom meeting: <https://us02web.zoom.us/j/88343850040>, Meeting ID: 883 4385 0040, Passcode: 515666)
- Meeting 8: 06. June 2023, 10-12 am: Objective: Retour on internal review: major issues (Join Zoom meeting: <https://us02web.zoom.us/j/88939535431>, Meeting ID: 889 3953 5431, Passcode: 060452)
- Meeting 9: 22. June 2023, 10-12am: Objective: Overview on section draft progress (2h, each section will present) (Join Zoom meeting: <https://us02web.zoom.us/j/81380072655>, Meeting ID: 813 8007 2655, Passcode: 632969)

#### **Milestones:**

- Call of contributions: 12.12.-01.02.2023
- OSR8 draft development: 09.02.-22.06.2023
- Final preparation phase: 22.06.-14.07.2023
- Submission to Journal: 14. July 2023

#### **Organization of internal review:**

- Phase 1 internal review: 16. May – 06. June 2023: Feedback to all sections, and an overview on internal review will be provided on the OSR8 call 8.



- Phase 2 internal review: 06. June- 14. July 2023: [Interactive exchanges to further support section development, including individually scheduled calls.](#)

## 2. Topical organization of the 8<sup>th</sup> CMEMS Ocean State Report:

### 2.1 Specifications for the sections to be developed

Note that more details will be provided in the OSR8 guideline, and in the OSR strategy document (both distributed on the 9<sup>th</sup> of February 2023). Major specifications include:

- Organization of email list for notifications: the initial list of emails should be established via the call of contribution documents. All section leads have the responsibility to assure that all co-authors are listed on this notification email list if they want to. A table example for authors is provided in the templates (see appendix). Note that first / corresponding authors will keep the responsibility to regularly inform and update the entire author team.
- For OSR8 chapters 2-4, the length of the section is limited to: max. of 4 figures / section, max. of 3000 words / section. Excluded from the 3000 words: figure captions, references, table of products, statement of main outcome. Length specifications for chapter 1 are provided in section 2.2 below.
- A product table will be added into each section, and contains a list of all products used in each section. The use of at least one CMEMS product is mandatory, however, all products available (including non-CMEMS products) can be listed in this table. This holds also for chapter 1, and a product table for each indicator will be included of sections 1.1. State of the global ocean and 1.2. State of the ocean in Europe (see section 2).
- You are invited to download previous OSR issues to further understand the format of the sections, and all links are provided here: <https://marine.copernicus.eu/science-learning/ocean-state-report/>
- Core-period to be covered 1993-2022 (depending on product availability and product limitations (in this case, exchange with MOI), the time series can be started earlier, or later; but the inclusion of data during the **year 2022 is mandatory**. For anomaly evaluations, the climatology averaged over the longest period available should be used.
- From OSR7 onwards, all sections will be handled as single submissions as part of a special issue, and thus **each section will be linked to its own DOI for publication**. A different DOI will be established for the entire report.

## 2.2 Chapter specifications

As previous issues of the CMEMS OSR (<https://marine.copernicus.eu/science-learning/ocean-state-report/>), the 8<sup>th</sup> issue will be organized through 4 specific chapters (Fig. 1). The major difference to previous reports is chapter 1, which is now dedicated to a synopsis of the ocean state & the marine environment over the past decades (see below).

### Chapter 1: The state of the ocean

**Objective:** To provide a regular synopsis of the state of the ocean and marine environment over the past decades, and up to the target year.

This chapter will be updated annually and will contain a synopsis of results from the Copernicus Ocean Monitoring Indicators<sup>1</sup> for reporting, together with a scientific context and major outcomes. The starting point for OSR8 is to focus on two major regions, i.e., the global ocean and the European regional seas (Fig. 4). This chapter will be organized into two main sections (section 1.1: State of the global ocean; section 1.2: State of the Ocean in Europe), both organized across indicator topics. The indicator topics included for OSR8 are aligned to ocean-related global climate indicators from the GCOS framework<sup>2</sup>, together with other indicators from the Copernicus Ocean Monitoring Indicator framework. Additional indicators can be proposed by experts during the call of contribution (Fig. 4). Each indicator topic should provide a state-of-the-art scientific context, together with a discussion of the results. A team of experts should be established for each indicator topic during the call of contribution, with respective responsibilities. Author teams will be listed per topic at the end of the document. Support will be provided by the Copernicus Ocean State Report coordination team.

Specifications for these two sections include:

- Science-driven description of each indicator topic should be limited to about 500 words.
- Each indicator topic should include relevant visualization, with a maximum of 2 figures per indicator topic.
- The use of at least one Copernicus Marine Service product is mandatory. A multi-product approach should be considered whenever possible to allow for collaborations, and the use of different types of products.
- Each indicator should provide information up to the year 2022.
- A robust uncertainty evaluation and associated error bar should be included for each indicator topic.

Three (for multiple options / meet availabilities) calls are proposed for the OSR experts from all TACs and MFCs to organize the contribution for chapter 1 in collaboration, and to further provide clarifications. If interested, additional experts are more than welcome to join this effort. Proposed calls for further clarifications are provided at the beginning of this document.

The contribution to this new Chapter 1 is encouraged through three different scenarios, described below.

---

<sup>1</sup> <https://marine.copernicus.eu/access-data/ocean-monitoring-indicators>

<sup>2</sup> <https://gcos.wmo.int/en/global-climate-indicators#:~:text=The%20Global%20Climate%20Indicators%20are,as%20well%20as%20the%20cryosphere.>

**Case 1:** An expert from the TACs and MFCs is proposed to help in the development of an indicator topic (either global or Europe, or both). The expected contribution will include the following:

- Product guidance, and if required pre-preparation of datasets, and figure development support
- Support the development of the draft, including a synthesis of state-of-the-art knowledge based on recent peer-reviewed literature, and the development of a robust uncertainty framework
- Participate in internal review process of the entire section (Global, Europe, or both)

**Case 2:** An expert proposes themselves to lead a specific indicator topic, either for the global section, or the Europe section, or both. In addition to the tasks proposed under Case 1, the expected contribution will include the following:

- Coordinate – with support from the OSR coordination team – the strategy and development of the section and figure development
- Assure the scientific quality of the section

**Case 3:** Proposition of an additional indicator. In addition to the tasks described under Case 1 and independently of taking the lead in the Case 2, the expected contribution will include the following:

- Assure integration of the additional indicator in the proposed structure, and assure overall coordination
- Note that the indicator should be already integrated in the Copernicus Marine Service Ocean Reporting activity (e.g., indicator published in previous OSR issues, and/or integrated in the OMI framework)

Please use the proposed template for the call of contribution process ([CALL OF CONTRIBUTION -Templates](#)).

| State of the global Ocean                                                                                                                                                                                                                                                                              | State of the Ocean in Europe                                                                                                                                                                                                                                                                           |
|--------------------------------------------------------------------------------------------------------------------------------------------------------------------------------------------------------------------------------------------------------------------------------------------------------|--------------------------------------------------------------------------------------------------------------------------------------------------------------------------------------------------------------------------------------------------------------------------------------------------------|
| <p>One section including info on:</p> <ul style="list-style-type: none"> <li>• SST</li> <li>• OHC</li> <li>• Sea Level</li> <li>• Ocean acidification &amp; CO2 flux</li> <li>• CHI-a</li> <li>• Sea ice</li> <li>• Others → call of contribution, from the implemented indicator framework</li> </ul> | <p>One section including info on:</p> <ul style="list-style-type: none"> <li>• SST</li> <li>• OHC</li> <li>• Sea Level</li> <li>• Ocean acidification &amp; CO2 flux</li> <li>• CHI-a</li> <li>• Sea ice</li> <li>• Others → call of contribution, from the implemented indicator framework</li> </ul> |

**Figure 4:** Overview on organization, and indicator topics for chapter 1 of OSR8.

## Chapter 2: Updated and new pathways in ocean science

**Objective:** To provide regular scientific reviews of the suite of indicators that inform the OSR, and to provide Copernicus Marine internal and other scientific and technical stakeholders a high-quality peer-reviewed pathway, and incremental updates for disseminating and accessing Copernicus Marine information on the state of the ocean

This chapter will contain scientific articles updated at either annual, or bi-annual frequency. Both, Essential Ocean Variables and Ocean Monitoring Indicators will build the baseline for the scientific studies. Results for the global ocean and for European regional seas will be included, and will cover information over the past decades, and up to the target year of each Report cycle. The use of at least one Copernicus Marine product is mandatory and can be complemented by non-CMEMS products. Following either an annual or bi-annual preparation phase will be agreed between the proposal expert and the Ocean State Report lead at the kick-off meeting of each Report cycle.

## Chapter 3: Ocean state and change for relevance to society

**Objective:** To provide scientific articles that contribute to improved understanding of the ocean state for relevance to society

This chapter will contain scientific articles updated at either annual, or bi-annual frequency. Both, Essential Ocean Variables and Ocean Monitoring Indicators will build the baseline for the scientific studies. Results for the global ocean and for European regional seas will be included and will cover societal-relevant information over the past decades, and up to the target

year of each Report cycle. The use of at least one Copernicus Marine product is mandatory and can be complemented by non-CMEMS products. Following either an annual or bi-annual preparation phase will be agreed between the proposal expert and the Ocean State Report lead at the kick-off meeting of each Report cycle.

#### **Chapter 4: Specific events in the ocean in 2022**

**Objective:** To provide on an annual basis scientific article on interesting events of the target year

This chapter will contain scientific articles updated at annual frequency. Both, Essential Ocean Variables and Ocean Monitoring Indicators will build the baseline for the scientific studies. Results for the global ocean and for European regional seas will be included and will cover information for the target year of each Report cycle. The use of at least one Copernicus Marine product is mandatory and can be complemented by non-CMEMS products.

## Appendix – Template

### Template proposition for chapter 1

Please, provide all the required information for every proposed contribution, individual cases and sections.

#### Contribution to which case and section? More than one option can be selected:

- Case 1: Expert proposed to help in the assessment
  - State of the global Ocean
  - State of the Ocean in Europe
- Case 2: Expert proposed to lead a specific section
  - State of the global Ocean
  - State of the Ocean in Europe
- Case 3: Proposition of additional indicator
  - State of the global Ocean
  - State of the Ocean in Europe

**Which indicator topic?** Please precise.

Main contact point (name, email):

List of authors (name, affiliation):

*Example for author information, please indicate in bold those authors which wish to be included in the OSR8 email list from the 09. of February onwards:*

| Name of expert        | Affiliation                          | Full address                                               | Email                                   |
|-----------------------|--------------------------------------|------------------------------------------------------------|-----------------------------------------|
| Karina von Schuckmann | Mercator Ocean International, France | 2 Av. de l'Aérodrome de Montaudran, 31400 Toulouse, France | Karina.von.schuckmann@mercator-ocean.fr |

**For Case 1 only:** Summary of the candidate's expertise and expectation for the section, and own contribution (max. 200 words):

**For Case 2 only:** Title of the proposed section and abstract of proposed rationale for this indicator topic (max. 500 words):

**For Case 3 only:** Short abstract (max. 500 words): include in the abstract how the proposed indicator will be integrated in the planned Chapter 1 structure. Note that the indicator should be already integrated in the Copernicus Marine Service Ocean Reporting activity (e.g., indicator published in previous OSR issues, and/or integrated in the OMI framework). If this is not the case, please, submit your section to Chapter 2.

**Data use** (at least one Copernicus Marine product is mandatory):

- CMEMS product (long-name, CMEMS product name):
- Non-CMEMS product (description (max. 100 words), scientific reference and or web link to data information; link to data source/download)

Time period to be covered (evaluation should go up to 2022):

**The propositions can be submitted through upload in the respective chapter folders: <https://atlas.mercator-ocean.fr/s/ycWec5N62ZjjygS>**

## Appendix – Template

### Template proposition for chapter 2-4

Contribution for which chapter?:

Main contact point (name, email):

Title of the proposed section:

List of authors (name, affiliation):

*Example for author information, please indicate in bold those authors which wish to be included in the OSR8 email list from the 09. of February onwards:*

| Name of expert        | Affiliation                          | Full address                                               | Email                                   |
|-----------------------|--------------------------------------|------------------------------------------------------------|-----------------------------------------|
| Karina von Schuckmann | Mercator Ocean International, France | 2 Av. de l'Aérodrome de Montaudran, 31400 Toulouse, France | Karina.von.schuckmann@mercator-ocean.fr |

Abstract (max. 500 words):

Data use:

- CMEMS product (long-name, CMEMS product name):
- Non-CMEMS product (description (max. 100 words), scientific reference and or web link to data information; link to data source/download)

Time period to be covered:

Why and for what is this topic important? (max. 150 words):

Stakeholders for the proposed topic (max. 100 words):

**For Chapter 2 & 3 only:** Will this section be developed for OSR8 or OSR9? If this section is proposed for OSR9 (i.e. 2-year development cycle), please provide a rationale & clear explanation why more time is needed (500 words):

**The propositions can be submitted through upload in the respective chapter folders: <https://atlas.mercator-ocean.fr/s/ycWec5N62ZjjvgS>**
